# Supplementary material for: Azo dye functionalized graphene nanoplatelets for selective detection of bisphenol A and hydrogen peroxide
Source: Royal Society of Chemistry journal article supplement (doi:10.1039/c5ra16530j), 2015-01-01
Supplement: c5ra16530j1.pdf [file c5ra16530j1.pdf]

Electronic Supplementary Material (ESI) for RSC Advances.

**Azo Dye Functionalized Graphene Nanoplatelets for Selective Detection of  
Bisphenol A and Hydrogen Peroxide†**

Nael G. Yasri<sup>a,b, c,±</sup>, Ashok K. Sundramoorthy<sup>a,±</sup>, and Sundaram Gunasekaran<sup>a,\*</sup>

<sup>a</sup>Department of Biological Systems Engineering

University of Wisconsin-Madison,

460 Henry Mall, Madison, WI 53706, USA

<sup>b</sup>Department of Chemistry

Faculty of Science, University of Aleppo, Syria

<sup>c</sup>Department of Chemical and Biochemical Engineering

Western University, London, Ontario, Canada.

\*Corresponding author: S. Gunasekaran ([guna@wisc.edu](mailto:guna@wisc.edu))

±Ashok K. Sundramoorthy and Nael G. Yasri have contributed equally to this work.

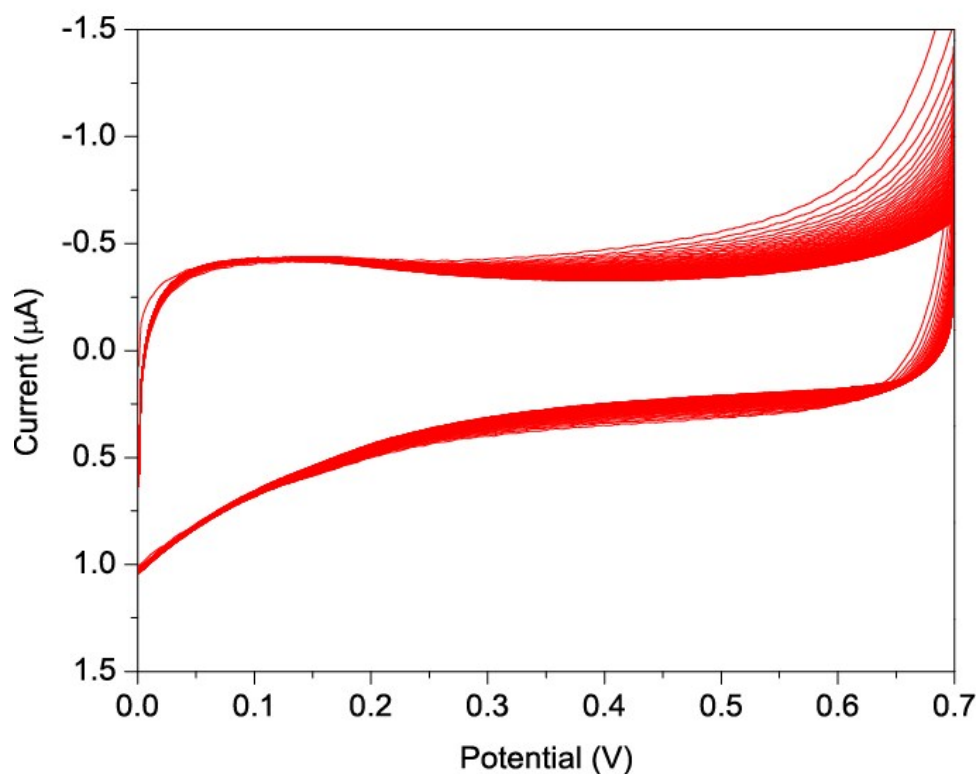

**Figure S1.** Continuous cyclic voltammograms of GNP/DB-GCE recorded for 100 cycles in pH 7.0 PBS at a scan rate of 50 mV/s.

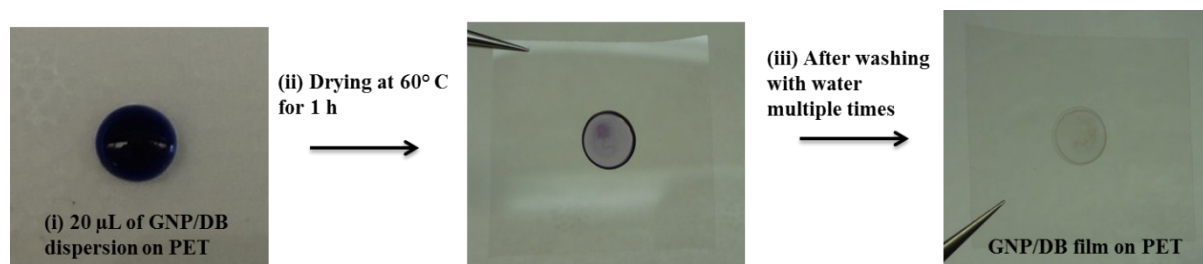

**Figure S2.** Photographs of GNP/DB- film preparation on a polyethylene terephthalate (PET) film. Even after multiple washings with water, a thin-GNP/DB film remained on the PET surface. Only free DB (unattached) was removed by water washing step. This indicated that GNP/DB nanocomposite film had strong binding affinity to the hydrophobic surface.
